# Supplementary figures and images for: Comparative and Expression Analysis of Ubiquitin Conjugating Domain-Containing Genes in Two Pyrus Species
Source: MDPI journal article supplement (doi:10.3390/cells7070077), 2018-07-16

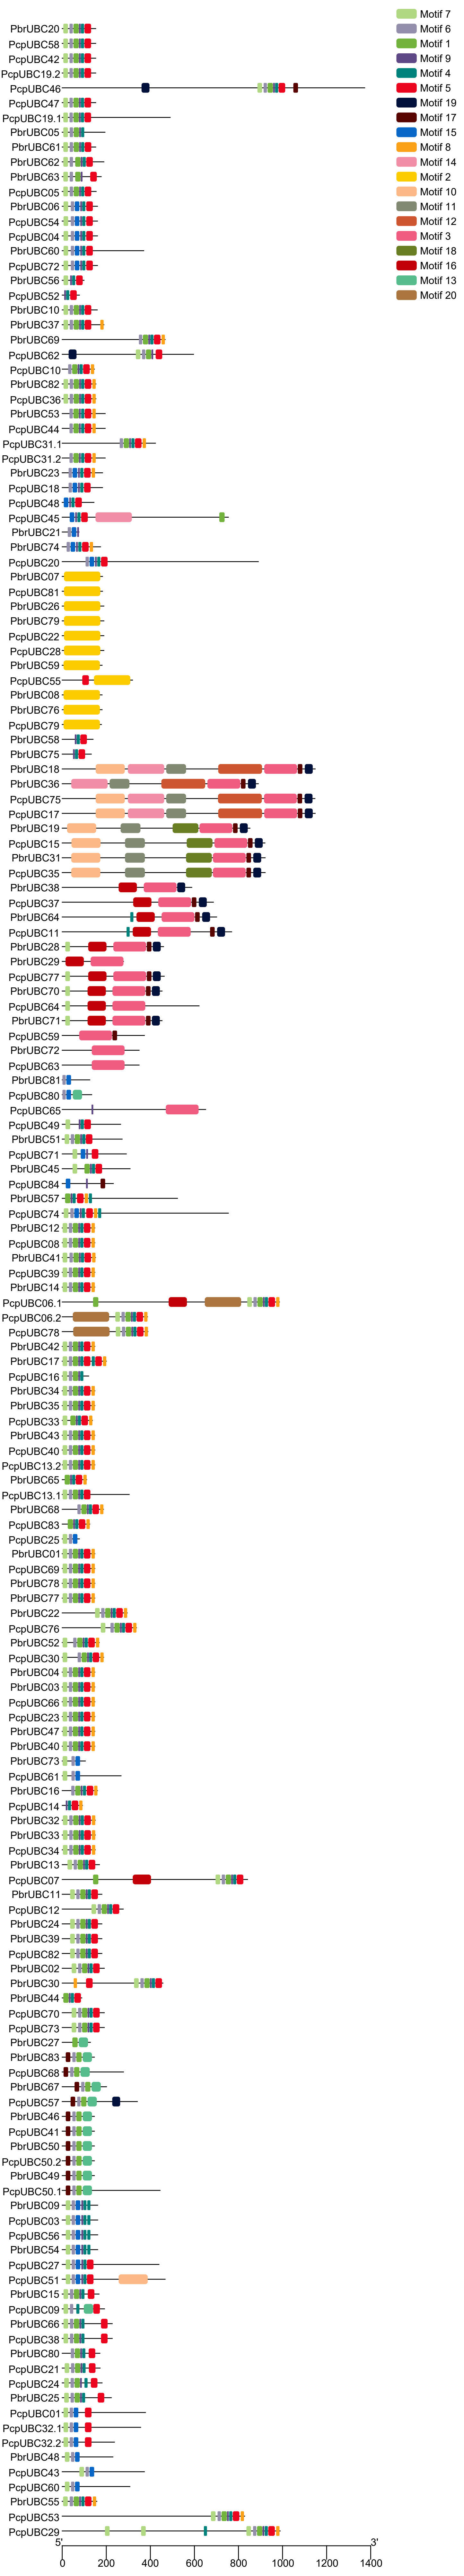

Supplement: s1 [file s1]

UTR  
CDS

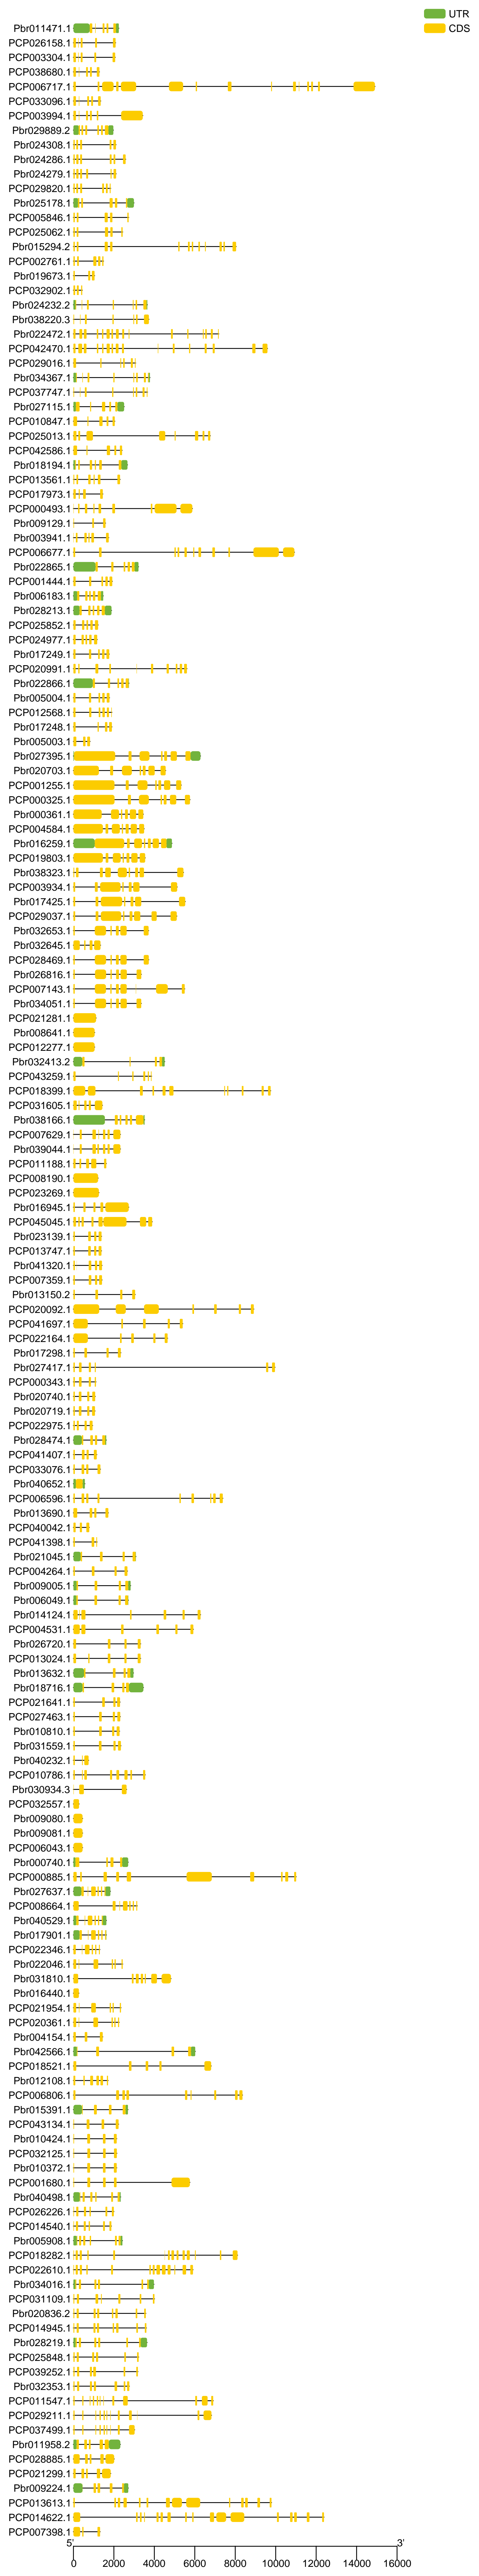

Supplement: s1 [file s1]

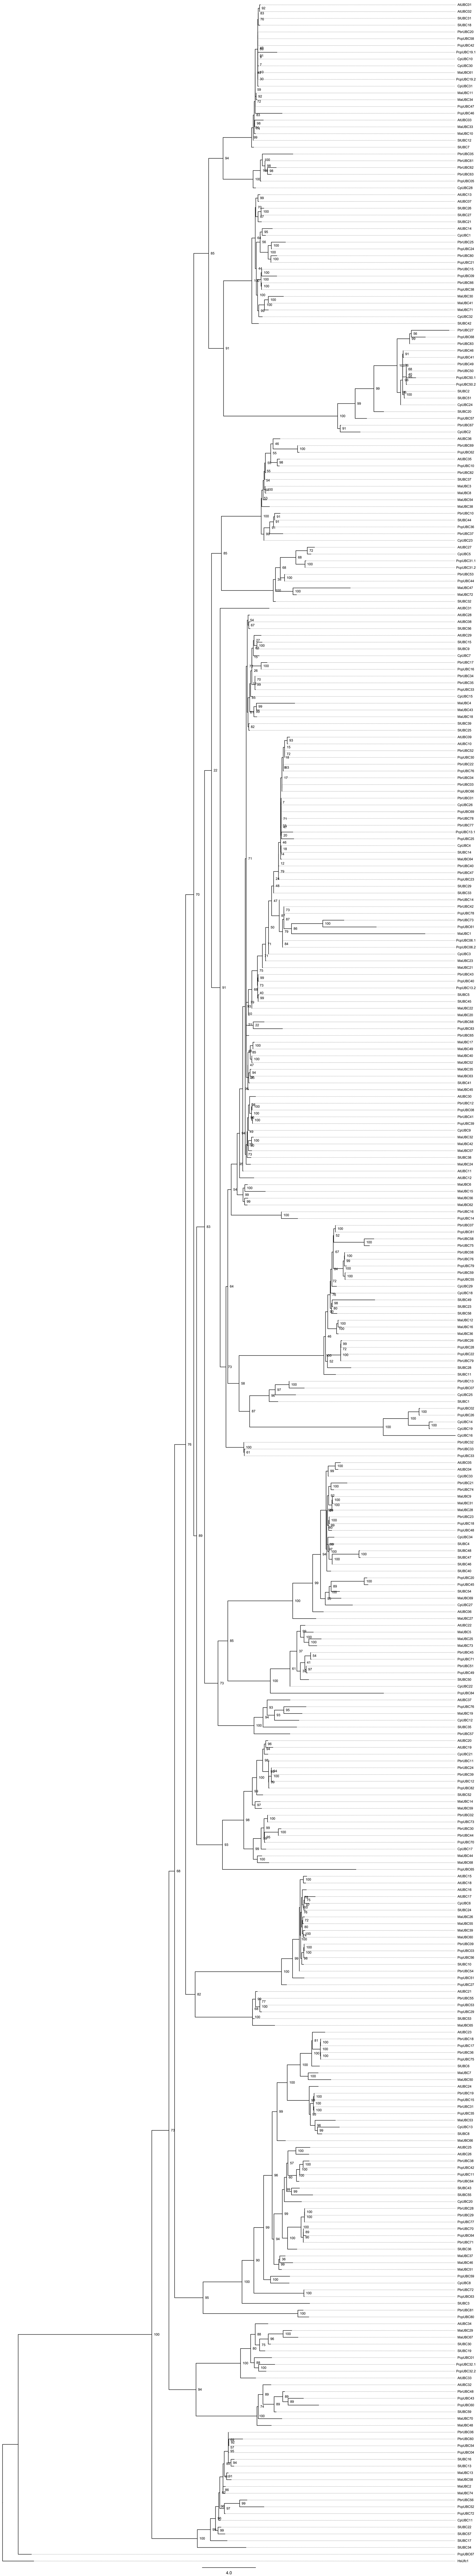

Supplement: s1 [file s1]
